# Supplementary material for: Improved plant biomass production under low nitrogen conditions through conditional accumulation of the second messenger, guanosine tetraphosphate, in chloroplasts and mitochondria
Source: Frontiers journal article supplement (doi:10.3389/fpls.2024.1524665), 2025-01-13
Supplement: Data_Sheet_1.pdf [file Data_Sheet_1.pdf]

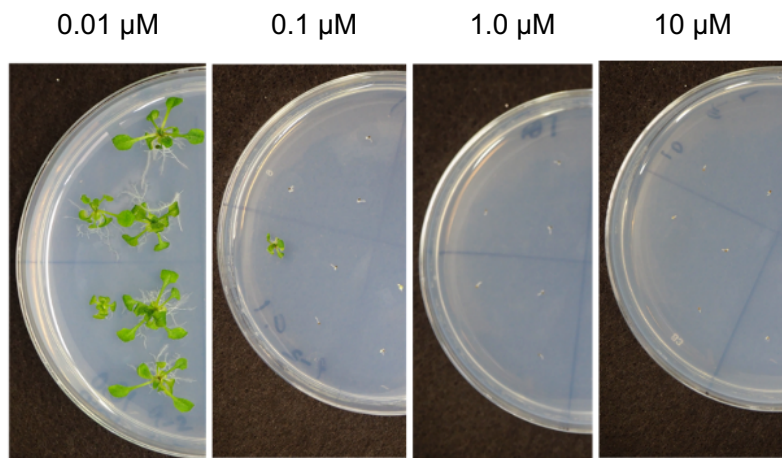

**Supplementary Figure 1** Growth of the Chl-#9 line on agar-solidified plants with different concentrations of estrogen (0.01, 0.1, 1.0, or 10  $\mu\text{M}$ ). Seeds were spread out on the plates and grown for 21 days.
